# Supplementary material
Source: Springer Nature journal article supplement (https://www.springermedizin.de/resource/supplementary/12967_2010_734_MOESM3_ESM.pdf/9577412)

**A****Uveal melanoma**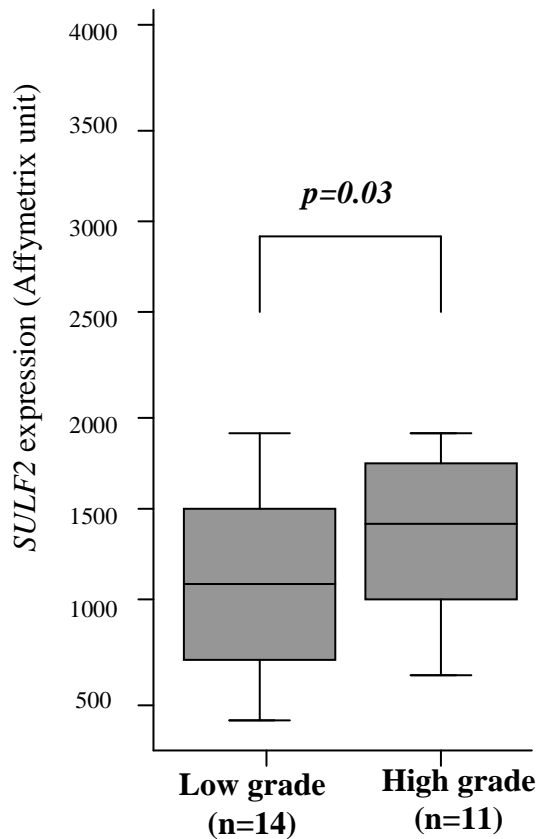**B**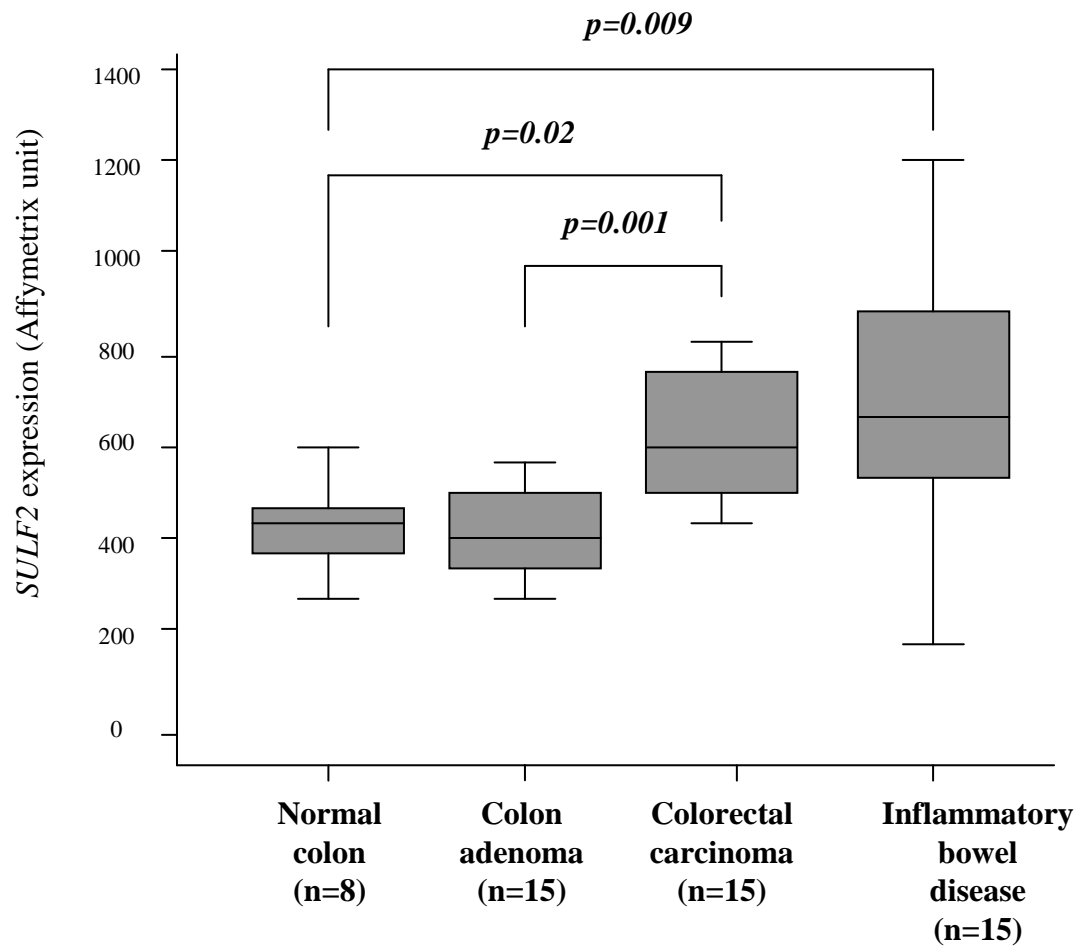

Supplement: MOESM3 [file 9577412]
